## RESEARCH ARTICLE

# Factors associated with anxiety during the first two years of the COVID-19 pandemic in the United States: An analysis of the COVID-19 Citizen Science study

Aaron E. Cozen<sup>1\*</sup>, Thomas Carton<sup>2</sup>, Rita Hamad<sup>3</sup>, John Kornak<sup>1</sup>, Madelaine Faulkner Modrow<sup>1</sup>, Noah D. Peyser<sup>4</sup>, Soo Park<sup>1</sup>, Jaime H. Orozco<sup>1</sup>, Matthew Brandner<sup>1,5</sup>, Emily C. O'Brien<sup>6</sup>, Djeneba Audrey Djibo<sup>7</sup>, Cheryl N. McMahon-Walraven<sup>7</sup>, Carmen R. Isasi<sup>8</sup>, Alexis L. Beatty<sup>1,4</sup>, Jeffrey E. Olgin<sup>4</sup>, Gregory M. Marcus<sup>4</sup>, Mark J. Pletcher<sup>1</sup>

**1** Department of Epidemiology and Biostatistics, University of California, San Francisco, San Francisco, CA, United States of America, **2** Louisiana Public Health Institute, New Orleans, LA, United States of America, **3** Dept of Social and Behavioral Sciences, Harvard School of Public Health, Boston, MA, United States of America, **4** Division of Cardiology, University of California, San Francisco, San Francisco, CA, United States of America, **5** Department of Family and Community Medicine, Philip R. Lee Institute for Health Policy Studies, University of California, San Francisco, San Francisco, CA, United States of America, **6** Duke Clinical Research Institute, Durham, NC, United States of America, **7** CVS Health Clinical Trial Services, Blue Bell, PA, United States of America, **8** Department of Epidemiology, Albert Einstein College of Medicine, The Bronx, NY, United States of America

\* [aecoze@gmail.com](mailto:aecoze@gmail.com)

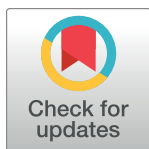

## OPEN ACCESS

**Citation:** Cozen AE, Carton T, Hamad R, Kornak J, Faulkner Modrow M, Peyser ND, et al. (2024) Factors associated with anxiety during the first two years of the COVID-19 pandemic in the United States: An analysis of the COVID-19 Citizen Science study. *PLoS ONE* 19(2): e0297922. <https://doi.org/10.1371/journal.pone.0297922>

**Editor:** Ali Montazeri, Iranian Institute for Health Sciences Research, ISLAMIC REPUBLIC OF IRAN

**Received:** September 21, 2023

**Accepted:** January 15, 2024

**Published:** February 6, 2024

**Copyright:** © 2024 Cozen et al. This is an open access article distributed under the terms of the [Creative Commons Attribution License](https://creativecommons.org/licenses/by/4.0/), which permits unrestricted use, distribution, and reproduction in any medium, provided the original author and source are credited.

**Data Availability Statement:** All relevant data are within the manuscript and its [Supporting Information](#) files.

**Funding:** Patient-Centered Outcomes Research Institute (<https://www.pcori.org/>); contract # COVID-2020C2-10761; P.I. Mark Pletcher The Bill and Melinda Gates Foundation (<https://www.gatesfoundation.org/>); grant # INV-017206; P.I. Mark Pletcher The National Institutes of Health (<https://www.nih.gov/>); grant # 3U2CEB021881-

## Abstract

COVID-19 increased the prevalence of clinically significant anxiety in the United States. To investigate contributing factors we analyzed anxiety, reported online via monthly Generalized Anxiety Disorders-7 (GAD-7) surveys between April 2020 and May 2022, in association with self-reported worry about the health effects of COVID-19, economic difficulty, personal COVID-19 experience, and subjective social status. 333,292 anxiety surveys from 50,172 participants (82% non-Hispanic white; 73% female; median age 55, IQR 42–66) showed high levels of anxiety, especially early in the pandemic. Anxiety scores showed strong independent associations with worry about the health effects of COVID-19 for oneself or family members (GAD-7 score +3.28 for highest vs. lowest category; 95% confidence interval: 3.24, 3.33;  $p < 0.0001$  for trend) and with difficulty paying for basic living expenses (+2.06; 1.97, 2.15,  $p < 0.0001$ ) in multivariable regression models after adjusting for demographic characteristics, COVID-19 case rates and death rates, and personal COVID-19 experience. High levels of COVID-19 health worry and economic stress were each more common among participants reporting lower subjective social status, and median anxiety scores for those experiencing both were in the range considered indicative of moderate to severe clinical anxiety disorders. In summary, health worry and economic difficulty both contributed to high rates of anxiety during the first two years of the COVID-19 pandemic in the US, especially in disadvantaged socioeconomic groups. Programs to address both health concerns and economic insecurity in vulnerable populations could help mitigate pandemic impacts on anxiety and mental health.

05S1; P.I. Jeffrey Olgin Dr. McMahon-Walraven and Dr. Djibo are employees of CVS Health. Dr. Beatty received a salary in 2018 and 2019 and stock from 2019 to 2021 from Apple Inc., outside the submitted work. Dr. Olgin received personal fees from Vivalnk and grants from Samsung outside the submitted work. The funders provided support in the form of salaries for authors, but did not have any additional role in the study design, data collection and analysis, decision to publish, or preparation of the manuscript. The specific roles of these authors are articulated in the 'author contributions' section.

**Competing interests:** The authors declare the following financial interests/personal relationships which may be considered as potential competing interests: Dr. McMahon-Walraven and Dr. Djibo are employees of CVS Health. Dr. Beatty received a salary in 2018 and 2019 and stock from 2019 to 2021 from Apple Inc., outside the submitted work. Dr. Olgin received personal fees from Vivalnk and grants from Samsung outside the submitted work. This does not alter our adherence to PLOS ONE policies on sharing data and materials.

## Introduction

Generalized anxiety and other mental health disorders were leading contributors to morbidity in the US and worldwide in the 20-year period preceding COVID-19 [1, 2]. The prevalence of clinically significant anxiety increased by 25–30% or more in the US and many other countries during the first year of the pandemic [1, 3, 4]. While SARS-CoV-2 infection itself may cause anxiety [5, 6], it is likely that pandemic-related social and economic factors including worry about the health effects of COVID-19, and financial hardship resulting from or exacerbated by pandemic economic disruptions have also contributed to increases in anxiety [4, 7, 8]. Understanding which factors are more important, for whom, and how they interact to cause anxiety may help policymakers and healthcare providers prepare for and respond to the ongoing effects of COVID-19, and future pandemics.

More than one million Americans have died from COVID-19, with especially high rates of morbidity and mortality among older adults, marginalized racial and ethnic groups, people with elevated risks of infection at work or at home, and people with less access to healthcare and vaccines [9–13]. The economic impacts of COVID-19 and pandemic-related restrictions have also been extensive and unequal. Contributing factors included high rates of unemployment, higher risk of COVID-19 exposure at work among workers with lower levels of education, loss of income for workers without paid sick leave, and reduced labor force participation for family care-givers following COVID-19 illness [8, 10, 14–16]. Understanding how these factors contribute to anxiety and other mental health conditions that have worsened during the pandemic is important for clinicians caring for patients with anxiety, and for policymakers seeking to balance pandemic risk reduction against economic considerations.

To investigate factors associated with anxiety over the first two years of the pandemic, we analyzed survey responses from the COVID-19 Citizen Science (CCS) study [17], an ongoing, entirely digital, longitudinal cohort study which has enrolled over 100,000 participants since its March 26, 2020 launch. The large cohort and longitudinal study design with repeated measures of anxiety and depression, along with the wide range of information collected on demographics, household characteristics, medical conditions, and occupational activities, present a unique opportunity to investigate factors associated with changes in mental health over the course of the pandemic. Given well-documented disparities in the health and economic impacts of the pandemic in the United States, we hypothesized that worry about the health effects of COVID-19 and economic distress were important contributors to anxiety, and that both factors were particularly important for socioeconomically vulnerable groups.

## Methods

### CCS study overview

The COVID-19 Citizen Science study (CCS) is a longitudinal cohort study launched March 26, 2020 on the Eureka Research Platform [18] to study COVID-19 testing, outcomes and patient-reported impact of the pandemic. Methods for the CCS study were described previously [17]. The recruitment period for this study of anxiety started March 26, 2020 and ended May 4, 2022; recruitment for the CCS study is ongoing with no prespecified enrollment targets or end dates for enrollment or completion. Participants were recruited by emailing participants in other Eureka platform studies, by press and word of mouth (including social media), and through partner programs and collaborating health systems [17, 19]. Initially, adults 18 or older were eligible if they had an iOS or Android smartphone with a valid cell phone number and agreed to participate in English; beginning January 2021 a parallel website was launched to enable recruitment without a smartphone. After receiving information about the study and

providing electronic consent to participate, participants were asked to complete a baseline survey about demographics, medical conditions, medications, and household characteristics, followed by weekly and monthly surveys about activities, health, attitudes and experience during the pandemic. All surveys were administered in English through the Eureka app or website. Participants were surveyed about symptoms of anxiety on a monthly basis beginning April 22, 2020. Engagement with recurring surveys was encouraged using push notifications, SMS text and email messages with a link to the Eureka app or website. The study was reviewed and approved by the University of California, San Francisco Institutional Review Board (17–21879).

### Study sample

We analyzed anxiety survey results returned between April 22, 2020 and May 4, 2022 from participants with complete baseline demographic characteristics including subjective social status [20], and a zip code identifiable in US government databases that was linkable with county-level COVID-19 case and death rates obtained from the New York Times [21]. Anxiety responses from these participants were included if we also had complete concurrent information regarding economic difficulty, daily occupational activities, personal COVID-19 experience including results of tests for active COVID-19 infection, and worry about the health impacts of COVID-19 in recurring surveys. Recurring surveys were delivered on a weekly or monthly basis, balancing participant burden and timeliness of time-varying factors.

### Measurements

Our primary outcome—*anxiety*—was measured in monthly surveys using a seven-item questionnaire for Generalized Anxiety Disorder (GAD-7), a validated survey with high reliability as a screening tool [22, 23]. Responses to each item in the GAD-7 survey are scored as integer values between 0–3 according to the frequency of symptoms during the preceding two weeks (“Not at all”, “Several days”, “More than half the days”, or “Nearly every day”), and the sum of all seven items produces a combined score between 0–21 [22, 23] (S1 Table). Incomplete GAD-7 surveys missing responses to any of the seven questionnaire items were removed from analysis.

We focused on associations with two potential primary drivers of anxiety: worry about the health effects of COVID-19, and economic difficulty. In each case, we analyzed concurrent responses provided on the same day as anxiety survey responses. Worry about health impacts of COVID-19 was measured by a single survey question, delivered weekly: “Over the past WEEK, how worried have you been that the health of you or your loved ones will be affected by COVID-19?”. Self-reported economic stress was recorded in monthly survey responses to two separate questions: “How hard is it for you (and your family) to pay for the very basics like food, rent or mortgage, heating, etc. over the past 30 days?” and “Did you have difficulty making ends meet over the past 30 days?”. We used the first question about difficulty paying for basic living expenses in our primary analysis of economic stress, and the second question about making ends meet in a supplemental analysis.

Additional measurements were used in analyses. MacArthur scale subjective social status values between 1 (lowest) and 10 (highest) [20], age, gender, race/ethnicity, medical conditions, education, employment field, living with school-aged children (grades K-12), and country of residence and zip code were recorded in baseline surveys. Income change, working from home and primary daily activities were recorded monthly. Daily county-level COVID-19 case and death rates from The New York Times (calculated as the trailing seven-day average per 100,000) were matched to corresponding anxiety survey responses using zip code-county

crosswalk files from the Department of Housing and Urban Development (HUD) and the Federal Office of Rural Health Policy (FORHP) [21, 24, 25]. For zip codes overlapping multiple counties, COVID-19 rates were weighted by the proportion of zip code residences in each associated county using crosswalk data files from HUD. Responses regarding test results for active COVID-19 infection and receipt of COVID-19 vaccine and booster shots were tabulated cumulatively from baseline and repeated surveys. Cumulative responses regarding test results for active COVID-19 infection were dichotomized as “Prior COVID-19 positive” or “No prior COVID-19 positive”. Cumulative responses regarding receipt of COVID-19 vaccine and booster shots were categorized as “None”, “1 or 2 doses” (primary vaccination), “vaccine + booster” (primary vaccination plus booster), or “No response” for participants who completed no prior survey questions about vaccination.

### Statistical analysis

All analyses were performed using R Statistical Software v4.3.2 or Stata v17. Counts of participants were tabulated according to baseline demographics, medical conditions, education and employment field. Participant frequencies stratified by subjective social status were compared using the chi-squared test. Monthly anxiety surveys completed and GAD-7 scores were then summarized according to baseline and time-varying characteristics. GAD-7 scores within covariate groups were compared using Welch’s ANOVA test. Frequencies for GAD-7 scores  $\geq 10$  within covariate groups were compared using the chi-squared test, or using Fisher’s exact test for unbalanced covariate groups with  $\leq 100$  observations in any subgroup. Plots of unadjusted anxiety scores over time were generated using the function “geom\_smooth” from the R package ggplot2, with default settings for the smoothing method (mgcv::gam), spline basis (bs = “cs”; for cubic regression with shrinkage) and spline dimension (k = 10).

To analyze associations between each of our primary predictor variables and anxiety, we constructed a series of generalized additive mixed models (using the R packages “gamm4” v0.2–6, “mgcv” v1.9–1, and “lme4” v1.1–35.1 [26]) with the GAD-7 anxiety score as the outcome variable. For each primary predictor, we started with a simple model including only the predictor and calendar time, modeled as a cubic spline of days elapsed following declaration of COVID-19 as a global pandemic by the WHO on March 11, 2020, specified using gamm4 defaults with thin plate regression as the spline smoothing basis and k = 10 as the basis dimension. We then accounted for repeated measures from individual participants and differing individual tendencies towards anxiety by including a random intercept for each participant. Models were further adjusted by adding 1) baseline demographic variables, including medical conditions and living with school-aged children; 2) county-level COVID-19 case and death rates; and 3) personal COVID-19 experience including prior COVID-19 test positivity, vaccination status, monthly hospitalization days and emergency room/urgent care visits (without hospital admission). Quadratic terms for age and subjective social status were included to model non-linear relationships. To estimate their independent contributions, the fully adjusted models included both COVID-19 health worry and economic stress (difficulty paying for basic living expenses in primary analysis, or difficulty making ends meet in a supplemental analysis). To test for interactions between COVID-19 worry, economic difficulty and subjective social status, we added a three-way interaction term to the fully adjusted model with difficulty paying for basic living expenses as the primary predictor, dichotomizing subjective social status values below versus at or above the median in the interaction term. Estimates for the total combined effects of these variables and their interactions were obtained using the R package “multcomp”.

## Results

Between April 22, 2020 and May 4, 2022, 56,299 participants submitted a total of 371,076 anxiety surveys. After removing incomplete GAD-7 questionnaires ( $n = 188$ ), participants reporting residence outside the United States ( $n = 1,634$ ) and responses where key covariates were missing ( $n = 26,108$ ), our analytic sample included 50,172 participants and 333,292 anxiety survey responses. These participants were predominantly non-Hispanic white (82%) and female (67%), with a median age of 55 (IQR 42–66). The majority of participants completed more than one anxiety survey (82%), accounting for 97% of the anxiety surveys analyzed (324,106). Approximately half of all participants were from Western census region states, with many from California (36%). A large proportion were highly educated with either a college degree (41%) or graduate degree (44%), and many reported employment in healthcare (18%) or education (12%). Participants reporting subjective social status at or above the median ( $\geq 7$  on scale of 1–10) were more likely to report older age, male gender, higher levels of education, and non-rural residence ( $p < .0001$  for all) (Table 1). Participants reporting lower subjective social status were more likely to report high levels of COVID-19 health worry (“Very worried” or “Extremely worried”; RR 1.24; 95% CI 1.21, 1.27;  $p < 0.0001$ ) and much more likely to report high levels of difficulty paying for basic living expenses (“Hard” or “Very hard”; RR 5.11; 95% CI 4.73, 5.52;  $p < 0.0001$ ) at least once during follow-up (Table 1 and S2 and S3 Tables).

The mean GAD-7 anxiety score was 4.0 +/- 4.6 overall, with 11.4% of all responses meeting criteria considered high risk for clinically significant generalized anxiety (GAD-7 score  $\geq 10$ ). Anxiety scores were generally higher among participants reporting lower subjective social status, younger age, non-male gender, non-White race (except for Black and Asian), Hispanic ethnicity, or lower education. Anxiety scores were also higher among participants living with children and with some types of medical conditions (respiratory conditions, immunodeficiency, anemia) ( $p < 0.001$  for all comparisons, Table 2).

Anxiety was variable across the pandemic and within participants over time. The mean range in GAD-7 anxiety scores was 4.9 +/- 4.2 (SD) points among participants who completed more than one anxiety survey. Responses earlier in the pandemic were associated with higher anxiety scores (Table 2), with subsequent fluctuations corresponding to successive waves of the pandemic and their repercussions in the US (Fig 1). Prior positive tests for active COVID-19 infection and county-level COVID-19 case and death rates were not associated with substantially elevated anxiety scores, but receipt of COVID-19 vaccinations was associated with lower anxiety scores. Worry about the health effects of COVID-19 for oneself or loved ones was associated with highly elevated anxiety scores (Table 2). Time-varying economic factors were also very strongly associated with elevated anxiety scores. These include decline in income, disability, unemployment, full or part-time student status, and difficulty paying for basic living expenses or making ends meet. More than 40% of responses among participants reporting the highest levels of COVID-19 health worry or economic difficulty were associated with GAD-7 scores indicating high risk for clinically significant generalized anxiety (GAD-7  $\geq 10$ ) (Table 2). Participants reporting high levels of *both* COVID-19 health worry and difficulty paying for basics were particularly prone to anxiety, with median scores considered high risk for generalized anxiety (GAD-7  $\geq 10$ ) in many of the highest categories of exposure, and median scores indicative of severe anxiety (GAD-7  $\geq 15$ ) at the highest levels of exposure among those also reporting lower subjective social status (Fig 2).

COVID-19 health worry and difficulty paying for basic living expenses were both independently associated with elevated GAD-7 anxiety scores in multivariable regression models (Table 3). After accounting for the general tendency for each participant to report higher or



Table 1. Baseline characteristics of participants stratified by subjective social status.

| Characteristic                                 | Value                                                  | Subjective Social Status 1–6<br>(n = 17518) | Subjective Social Status 7–10<br>(n = 32654) |
|------------------------------------------------|--------------------------------------------------------|---------------------------------------------|----------------------------------------------|
| Age group                                      | 18–34                                                  | 3153 (18%)                                  | 3477 (10.6%)                                 |
|                                                | 35–49                                                  | 5786 (33%)                                  | 9757 (29.9%)                                 |
|                                                | 50–64                                                  | 5048 (28.8%)                                | 10350 (31.7%)                                |
|                                                | ≥65                                                    | 3531 (20.2%)                                | 9070 (27.8%)                                 |
| Gender                                         | Female                                                 | 12688 (72.4%)                               | 20960 (64.2%)                                |
|                                                | Male                                                   | 4416 (25.2%)                                | 11409 (34.9%)                                |
|                                                | Genderqueer                                            | 157 (0.9%)                                  | 116 (0.4%)                                   |
|                                                | Another Gender Identity                                | 111 (0.6%)                                  | 71 (0.2%)                                    |
|                                                | Not stated or decline to state                         | 49 (0.3%)                                   | 48 (0.1%)                                    |
|                                                | Transgender Man                                        | 56 (0.3%)                                   | 33 (0.1%)                                    |
|                                                | Transgender Woman                                      | 41 (0.2%)                                   | 17 (0.1%)                                    |
|                                                | Race                                                   | White                                       | 14630 (83.5%)                                |
| Asian (including South Asian and Asian Indian) |                                                        | 736 (4.2%)                                  | 1655 (5.1%)                                  |
| More than one race                             |                                                        | 896 (5.1%)                                  | 1027 (3.1%)                                  |
| Black or African American                      |                                                        | 515 (2.9%)                                  | 421 (1.3%)                                   |
| Some other race                                |                                                        | 464 (2.6%)                                  | 380 (1.2%)                                   |
| Not stated                                     |                                                        | 167 (1%)                                    | 249 (0.8%)                                   |
| American Indian or Alaska Native               |                                                        | 45 (0.3%)                                   | 39 (0.1%)                                    |
| Don't know                                     |                                                        | 40 (0.2%)                                   | 24 (0.1%)                                    |
| Native Hawaiian or Pacific Islander            |                                                        | 25 (0.1%)                                   | 24 (0.1%)                                    |
| Hispanic ethnicity                             | No                                                     | 15638 (89.3%)                               | 30751 (94.2%)                                |
|                                                | Yes: Mexican, Mexican American or Chicano              | 803 (4.6%)                                  | 716 (2.2%)                                   |
|                                                | Yes: Other or Mixed Hispanic, Latino or Spanish origin | 666 (3.8%)                                  | 802 (2.5%)                                   |
|                                                | Yes: Puerto Rican                                      | 177 (1%)                                    | 139 (0.4%)                                   |
|                                                | Don't know                                             | 114 (0.7%)                                  | 93 (0.3%)                                    |
|                                                | Prefer not to state                                    | 67 (0.4%)                                   | 87 (0.3%)                                    |
|                                                | Yes: Cuban                                             | 52 (0.3%)                                   | 65 (0.2%)                                    |
|                                                | Not stated                                             | 1 (0%)                                      | 1 (0%)                                       |
| Education                                      | No high school degree                                  | 76 (0.4%)                                   | 19 (0.1%)                                    |
|                                                | High school degree or equivalent                       | 4253 (24.3%)                                | 2541 (7.8%)                                  |
|                                                | College degree (including associate's)                 | 8190 (46.8%)                                | 12511 (38.3%)                                |
|                                                | Graduate degree                                        | 4742 (27.1%)                                | 17356 (53.2%)                                |
|                                                | Other                                                  | 225 (1.3%)                                  | 182 (0.6%)                                   |
|                                                | Don't know or not stated                               | 32 (0.2%)                                   | 45 (0.1%)                                    |
| Employment                                     | Other or not stated                                    | 7273 (41.5%)                                | 13953 (42.7%)                                |
|                                                | Healthcare                                             | 3298 (18.8%)                                | 5872 (18%)                                   |
|                                                | Education                                              | 2276 (13%)                                  | 3989 (12.2%)                                 |
|                                                | Scientific and technical services                      | 1152 (6.6%)                                 | 3861 (11.8%)                                 |
|                                                | Finance and insurance                                  | 771 (4.4%)                                  | 1815 (5.6%)                                  |
|                                                | Arts, entertainment, and recreation                    | 538 (3.1%)                                  | 813 (2.5%)                                   |
|                                                | Retail                                                 | 624 (3.6%)                                  | 417 (1.3%)                                   |
|                                                | Manufacturing                                          | 398 (2.3%)                                  | 641 (2%)                                     |
|                                                | Hospitality and food services                          | 437 (2.5%)                                  | 335 (1%)                                     |
|                                                | Construction                                           | 297 (1.7%)                                  | 389 (1.2%)                                   |
|                                                | Transportation                                         | 302 (1.7%)                                  | 344 (1.1%)                                   |
|                                                | Utilities                                              | 152 (0.9%)                                  | 225 (0.7%)                                   |

(Continued)

Table 1. (Continued)

| Characteristic                              | Value                                                                                          | Subjective Social Status 1–6<br>(n = 17518) | Subjective Social Status 7–10<br>(n = 32654) |
|---------------------------------------------|------------------------------------------------------------------------------------------------|---------------------------------------------|----------------------------------------------|
| Children                                    | Live with children (k-12 age)                                                                  | 4187 (23.9%)                                | 7896 (24.2%)                                 |
| Rural residence                             | Rural zip code                                                                                 | 1936 (11.1%)                                | 2346 (7.2%)                                  |
| US Census Region                            | West                                                                                           | 7856 (44.8%)                                | 17027 (52.1%)                                |
|                                             | Midwest                                                                                        | 3796 (21.7%)                                | 5419 (16.6%)                                 |
|                                             | Northeast                                                                                      | 1850 (10.6%)                                | 3490 (10.7%)                                 |
|                                             | South                                                                                          | 4014 (22.9%)                                | 6717 (20.6%)                                 |
|                                             | Territory                                                                                      | 2 (0%)                                      | 1 (0%)                                       |
| Baseline medical conditions                 | High blood pressure                                                                            | 5036 (28.7%)                                | 8695 (26.6%)                                 |
|                                             | Diabetes                                                                                       | 1454 (8.3%)                                 | 1757 (5.4%)                                  |
|                                             | Coronary artery disease                                                                        | 694 (4%)                                    | 1347 (4.1%)                                  |
|                                             | Heart attack                                                                                   | 305 (1.7%)                                  | 513 (1.6%)                                   |
|                                             | Congestive heart failure                                                                       | 240 (1.4%)                                  | 284 (0.9%)                                   |
|                                             | Stroke                                                                                         | 407 (2.3%)                                  | 590 (1.8%)                                   |
|                                             | Atrial fibrillation                                                                            | 647 (3.7%)                                  | 1409 (4.3%)                                  |
|                                             | Sleep apnea                                                                                    | 2604 (14.9%)                                | 3974 (12.2%)                                 |
|                                             | COPD                                                                                           | 597 (3.4%)                                  | 558 (1.7%)                                   |
|                                             | Asthma                                                                                         | 2161 (12.3%)                                | 2748 (8.4%)                                  |
|                                             | Cancer                                                                                         | 974 (5.6%)                                  | 2178 (6.7%)                                  |
|                                             | Immunodeficiency                                                                               | 710 (4.1%)                                  | 857 (2.6%)                                   |
|                                             | HIV                                                                                            | 151 (0.9%)                                  | 140 (0.4%)                                   |
|                                             | Anemia                                                                                         | 2417 (13.8%)                                | 3074 (9.4%)                                  |
|                                             | Pregnant at baseline                                                                           | 159 (0.9%)                                  | 350 (1.1%)                                   |
| COVID-19 health worry                       | High levels of COVID-19 health worry <sup>1</sup> reported at any time during follow-up        | 7648 (43.7%)                                | 11479 (35.2%)                                |
| Difficulty paying for basic living expenses | High levels of difficulty paying for basics <sup>2</sup> reported at any time during follow-up | 2299 (13.1%)                                | 839 (2.6%)                                   |

<sup>1</sup> –COVID-19 health worry reported as “Very worried” or “Extremely worried”.

<sup>2</sup> –Difficulty paying for basic living expenses reported as “Hard” or “Very hard”

<https://doi.org/10.1371/journal.pone.0297922.t001>

lower GAD-7 scores (Model 2), and adjusting for other covariates (Model 3), highly significant dose-response trends were evident ( $p < 2e-16$  for each), adding 2–3 additional points to GAD-7 scores in highest categories of exposure (Table 3 and S4 Table). Lower subjective social status was also independently associated with higher GAD-7 scores in fully adjusted models ( $p < 2e-16$ ). To investigate potential synergistic effects between economic stress, COVID-19 health worry and subjective social status we added interactions to the fully adjusted model shown in Table 3, dichotomizing subjective social status values above or below the median in the interaction terms. The effects of COVID-19 health worry and difficulty paying for basics were independent and additive ( $p < 2e-16$  for each) but not strongly synergistic in this model with interactions included, predicting GAD-7 scores 5.4 or 5.0 points higher at the highest levels of exposure for lower or higher subjective social status participants, respectively (Fig 2 and S5 Table).

A version of the complete dataset used for all analyses is provided with minor modifications for anonymization (S1 File and S6 Table provides corresponding regression model results).

Table 2. Anxiety scores by baseline and time-varying characteristics.

| Characteristic           |                                                        | Participants | Monthly surveys completed     |        | GAD-7 anxiety score |                      |                    |                      |
|--------------------------|--------------------------------------------------------|--------------|-------------------------------|--------|---------------------|----------------------|--------------------|----------------------|
|                          |                                                        |              |                               |        | Mean +/- SD         | p-value <sup>1</sup> | Proportion ≥ 10, % | p-value <sup>2</sup> |
|                          |                                                        |              | Per participant, median (IQR) | Total  |                     |                      |                    |                      |
| <b>Overall</b>           |                                                        | 50172        | 5 (2, 9)                      | 333292 | 4.0 +/- 4.6         | ..                   | 11.4%              | ..                   |
| Subjective social status | 1                                                      | 117          | 3 (1, 6)                      | 529    | 8.3 +/-7.2          | < 0.0001             | 38.8%              | < 0.0001             |
|                          | 2                                                      | 283          | 4 (2, 8)                      | 1637   | 7.8 +/-6.6          |                      | 37.1%              |                      |
|                          | 3                                                      | 1114         | 4 (1, 8)                      | 6492   | 6.7 +/-5.8          |                      | 27.2%              |                      |
|                          | 4                                                      | 2577         | 4 (2, 8)                      | 15488  | 5.8 +/-5.5          |                      | 21.6%              |                      |
|                          | 5                                                      | 5099         | 4 (2, 8)                      | 30399  | 4.9 +/-5.1          |                      | 16.0%              |                      |
|                          | 6                                                      | 8328         | 5 (2, 9)                      | 54476  | 4.4 +/-4.7          |                      | 13.4%              |                      |
|                          | 7                                                      | 13905        | 5 (2, 9)                      | 93081  | 3.9 +/-4.4          |                      | 10.5%              |                      |
|                          | 8                                                      | 11873        | 5 (2, 10)                     | 82779  | 3.4 +/-4.1          |                      | 8.4%               |                      |
|                          | 9                                                      | 5128         | 5 (2, 10)                     | 36812  | 3.0 +/-3.8          |                      | 6.9%               |                      |
|                          | 10                                                     | 1748         | 5 (2, 10)                     | 11599  | 2.6 +/-3.7          |                      | 5.7%               |                      |
| Age group                | 18–34                                                  | 6630         | 3 (1, 7)                      | 31738  | 6.2 +/-5.2          | < 0.0001             | 22.4%              | < 0.0001             |
|                          | 35–49                                                  | 15543        | 4 (2, 9)                      | 95606  | 5.2 +/-4.9          |                      | 16.9%              |                      |
|                          | 50–64                                                  | 15398        | 5 (2, 10)                     | 111429 | 3.7 +/-4.4          |                      | 9.6%               |                      |
|                          | ≥65                                                    | 12601        | 6 (3, 10)                     | 94519  | 2.4 +/-3.4          |                      | 4.3%               |                      |
| Gender                   | Female                                                 | 33648        | 5 (2, 9)                      | 224075 | 4.4 +/-4.7          | < 0.0001             | 12.8%              | < 0.0001             |
|                          | Male                                                   | 15825        | 5 (2, 9)                      | 104868 | 3.0 +/-4.1          |                      | 7.5%               |                      |
|                          | Genderqueer                                            | 273          | 4 (2, 9)                      | 1743   | 8.1 +/-5.6          |                      | 33.8%              |                      |
|                          | Another Gender Identity                                | 182          | 5 (2, 9)                      | 1136   | 8.3 +/-5.8          |                      | 38.2%              |                      |
|                          | Not stated or decline to state                         | 97           | 3 (2, 7)                      | 467    | 5.5 +/-4.8          |                      | 20.6%              |                      |
|                          | Transgender Man                                        | 89           | 5 (2, 11)                     | 641    | 8.2 +/-5.1          |                      | 35.6%              |                      |
|                          | Transgender Woman                                      | 58           | 4 (2, 9)                      | 362    | 5.8 +/-5.7          |                      | 22.7%              |                      |
| Race                     | White                                                  | 43465        | 5 (2, 10)                     | 294247 | 4.0 +/-4.5          | < 0.0001             | 11.3%              | < 0.0001             |
|                          | Asian (including South Asian and Asian Indian)         | 2391         | 4 (2, 9)                      | 14546  | 3.5 +/-4.3          |                      | 9.0%               |                      |
|                          | More than one race                                     | 1923         | 4 (2, 9)                      | 11766  | 5.0 +/-5.2          |                      | 16.9%              |                      |
|                          | Black or African American                              | 936          | 4 (2, 7)                      | 4890   | 3.6 +/-4.5          |                      | 10.9%              |                      |
|                          | Some other race                                        | 844          | 3 (2, 7)                      | 4344   | 4.7 +/-5.3          |                      | 16.1%              |                      |
|                          | Not stated                                             | 416          | 4 (2, 8)                      | 2487   | 4.1 +/-4.5          |                      | 11.4%              |                      |
|                          | American Indian or Alaska Native                       | 84           | 3 (2, 7)                      | 420    | 4.8 +/-5.9          |                      | 17.9%              |                      |
|                          | Don't know                                             | 64           | 4 (2, 7)                      | 311    | 4.7 +/-5.6          |                      | 18.0%              |                      |
|                          | Native Hawaiian or Pacific Islander                    | 49           | 4 (2, 8)                      | 281    | 4.0 +/-4.7          |                      | 11.0%              |                      |
| Hispanic ethnicity       | No                                                     | 46389        | 5 (2, 9)                      | 312117 | 3.9 +/-4.5          | < 0.0001             | 11.1%              | < 0.0001             |
|                          | Yes: Mexican, Mexican American or Chicano              | 1519         | 4 (2, 9)                      | 8767   | 5.0 +/-5.2          |                      | 16.8%              |                      |
|                          | Yes: Other or Mixed Hispanic, Latino or Spanish origin | 1468         | 4 (2, 8)                      | 8119   | 4.9 +/-5.3          |                      | 16.5%              |                      |
|                          | Yes: Puerto Rican                                      | 316          | 4 (2, 8)                      | 1767   | 5.1 +/-5.4          |                      | 17.0%              |                      |
|                          | Don't know                                             | 207          | 4 (2, 8)                      | 1204   | 4.8 +/-4.9          |                      | 16.4%              |                      |
|                          | Prefer not to state                                    | 154          | 3.5 (1, 6)                    | 755    | 3.6 +/-4.5          |                      | 10.1%              |                      |
|                          | Yes: Cuban                                             | 117          | 3 (1, 6)                      | 551    | 5.0 +/-5.3          |                      | 18.3%              |                      |
|                          | Not stated                                             | 2            | 6 (4.5, 7.5)                  | 12     | 2.1 +/-3.6          |                      | 0.0%               |                      |

(Continued)



Table 2. (Continued)

| Characteristic                     | Participants                           | Monthly surveys completed     |            | GAD-7 anxiety score |                      |                    |                      |          |
|------------------------------------|----------------------------------------|-------------------------------|------------|---------------------|----------------------|--------------------|----------------------|----------|
|                                    |                                        | Per participant, median (IQR) | Total      | Mean +/- SD         | p-value <sup>1</sup> | Proportion ≥ 10, % | p-value <sup>2</sup> |          |
|                                    |                                        |                               |            |                     |                      |                    |                      |          |
| Education                          | No high school degree                  | 95                            | 3 (1.5, 7) | 460                 | 5.0 +/-5.1           | < 0.0001           | 15.7%                | < 0.0001 |
|                                    | High school degree or equivalent       | 6794                          | 4 (2, 8)   | 39792               | 4.5 +/-5.2           |                    | 15.1%                |          |
|                                    | College degree (including associate's) | 20701                         | 5 (2, 9)   | 134069              | 4.1 +/-4.6           |                    | 11.6%                |          |
|                                    | Graduate degree                        | 22098                         | 5 (2, 10)  | 155988              | 3.8 +/-4.4           |                    | 10.2%                |          |
|                                    | Other                                  | 407                           | 5 (2, 9)   | 2538                | 4.4 +/-5.2           |                    | 14.4%                |          |
|                                    | Don't know or not stated               | 77                            | 5 (2, 8)   | 445                 | 5.2 +/-5.6           |                    | 20.0%                |          |
| Employment                         | Other or not stated                    | 21226                         | 5 (2, 10)  | 146529              | 3.6 +/-4.4           | < 0.0001           | 9.8%                 | < 0.0001 |
|                                    | Healthcare                             | 9170                          | 4 (2, 9)   | 57745               | 4.2 +/-4.6           |                    | 12.2%                |          |
|                                    | Education                              | 6265                          | 5 (2, 10)  | 42999               | 4.7 +/-4.7           |                    | 13.9%                |          |
|                                    | Scientific and technical services      | 5013                          | 5 (2, 10)  | 34509               | 4.1 +/-4.5           |                    | 11.9%                |          |
|                                    | Finance and insurance                  | 2586                          | 5 (2, 9)   | 16637               | 3.8 +/-4.4           |                    | 10.4%                |          |
|                                    | Arts, entertainment, and recreation    | 1351                          | 5 (2, 10)  | 8780                | 5.1 +/-5.2           |                    | 16.7%                |          |
|                                    | Retail                                 | 1041                          | 4 (1, 8)   | 5791                | 5.0 +/-5.2           |                    | 17.1%                |          |
|                                    | Manufacturing                          | 1039                          | 4 (2, 9)   | 6304                | 3.3 +/-4.1           |                    | 8.1%                 |          |
|                                    | Hospitality and food services          | 772                           | 4 (1, 8)   | 4407                | 5.0 +/-5.1           |                    | 16.8%                |          |
|                                    | Construction                           | 686                           | 4 (2, 8)   | 3835                | 4.0 +/-4.7           |                    | 11.6%                |          |
|                                    | Transportation                         | 646                           | 4 (2, 8)   | 3569                | 3.8 +/-4.9           |                    | 11.9%                |          |
|                                    | Utilities                              | 377                           | 4 (2, 8)   | 2187                | 4.2 +/-4.5           |                    | 11.9%                |          |
|                                    | Children in household                  | Live with children            | 12083      | 4 (2, 8)            | 71725                |                    | 4.7 +/-4.8           |          |
| Do not live with children or other |                                        | 38089                         | 5 (2, 10)  | 261567              | 3.8 +/-4.5           | 10.6%              |                      |          |
| Zip code                           | Rural zip code                         | 4282                          | 5 (2, 9)   | 28197               | 3.9 +/-4.6           | 0.0031             | 11.4%                | 0.8      |
|                                    | Non-rural zip code                     | 45890                         | 5 (2, 9)   | 305095              | 4.0 +/-4.6           |                    | 11.4%                |          |
| US Census region                   | West                                   | 24883                         | 5 (2, 10)  | 175739              | 4.0 +/-4.5           | < 0.0001           | 11.1%                | < 0.0001 |
|                                    | Midwest                                | 9215                          | 5 (2, 10)  | 60545               | 3.9 +/-4.5           |                    | 11.2%                |          |
|                                    | Northeast                              | 5340                          | 4 (2, 8)   | 33814               | 4.4 +/-4.8           |                    | 13.1%                |          |
|                                    | South                                  | 10731                         | 4 (2, 7)   | 63182               | 4.0 +/-4.6           |                    | 11.5%                |          |
|                                    | Territory                              | 3                             | 3 (2, 5.5) | 12                  | 8.2 +/-4.3           |                    | 16.7%                |          |
| High blood pressure                | High blood pressure                    | 13731                         | 5 (2, 9)   | 94237               | 3.4 +/-4.4           | < 0.0001           | 9.2%                 | < 0.0001 |
|                                    | No, don't know or not stated           | 36441                         | 5 (2, 9)   | 239055              | 4.2 +/-4.6           |                    | 12.3%                |          |
| Diabetes                           | Diabetes                               | 3211                          | 5 (2, 8)   | 20553               | 3.7 +/-4.6           | < 0.0001           | 10.6%                | < 0.0001 |
|                                    | No, don't know or not stated           | 46961                         | 5 (2, 9)   | 312739              | 4.0 +/-4.6           |                    | 11.5%                |          |
| Coronary artery disease            | Coronary artery disease                | 2041                          | 5 (3, 9)   | 13658               | 2.9 +/-4.2           | < 0.0001           | 7.5%                 | < 0.0001 |
|                                    | No, don't know or not stated           | 48131                         | 5 (2, 9)   | 319634              | 4.0 +/-4.6           |                    | 11.6%                |          |
| Heart attack                       | Heart attack                           | 818                           | 5 (3, 9)   | 5484                | 2.9 +/-4.2           | < 0.0001           | 7.7%                 | < 0.0001 |
|                                    | No, don't know or not stated           | 49354                         | 5 (2, 9)   | 327808              | 4.0 +/-4.6           |                    | 11.5%                |          |
| Congestive heart failure           | Congestive heart failure               | 524                           | 5 (2, 9)   | 3418                | 3.8 +/-4.8           | 0.067              | 11.7%                | 0.59     |
|                                    | No, don't know or not stated           | 49648                         | 5 (2, 9)   | 329874              | 4.0 +/-4.6           |                    | 11.4%                |          |
| Stroke                             | Stroke                                 | 997                           | 5 (2, 9)   | 6595                | 3.8 +/-4.6           | 0.00012            | 11.3%                | 0.66     |
|                                    | No, don't know or not stated           | 49175                         | 5 (2, 9)   | 326697              | 4.0 +/-4.6           |                    | 11.4%                |          |
| Atrial fibrillation                | Atrial fibrillation                    | 2056                          | 6 (3, 10)  | 15124               | 2.8 +/-3.9           | < 0.0001           | 6.6%                 | < 0.0001 |
|                                    | No, don't know or not stated           | 48116                         | 5 (2, 9)   | 318168              | 4.1 +/-4.6           |                    | 11.7%                |          |
| Sleep apnea                        | Sleep apnea                            | 6578                          | 5 (2, 9)   | 44303               | 4.0 +/-4.6           | 0.59               | 11.8%                | 0.0046   |
|                                    | No, don't know or not stated           | 43594                         | 5 (2, 9)   | 288989              | 4.0 +/-4.6           |                    | 11.4%                |          |

(Continued)

Table 2. (Continued)

| Characteristic                              |                              | Participants | Monthly surveys completed     |        | GAD-7 anxiety score |                      |                    |                      |
|---------------------------------------------|------------------------------|--------------|-------------------------------|--------|---------------------|----------------------|--------------------|----------------------|
|                                             |                              |              | Per participant, median (IQR) | Total  | Mean +/- SD         | p-value <sup>1</sup> | Proportion ≥ 10, % | p-value <sup>2</sup> |
| COPD                                        | COPD                         | 1155         | 5 (2, 9)                      | 7391   | 4.4 +/-4.9          | < 0.0001             | 13.4%              | < 0.0001             |
|                                             | No, don't know or not stated | 49017        | 5 (2, 9)                      | 325901 | 4.0 +/-4.6          |                      | 11.4%              |                      |
| Asthma                                      | Asthma                       | 4909         | 5 (2, 9)                      | 31952  | 5.1 +/-5.1          | < 0.0001             | 17.2%              | < 0.0001             |
|                                             | No, don't know or not stated | 45263        | 5 (2, 9)                      | 301340 | 3.9 +/-4.5          |                      | 10.8%              |                      |
| Cancer                                      | Cancer                       | 3152         | 6 (2, 10)                     | 21734  | 3.1 +/-4.1          | < 0.0001             | 7.0%               | < 0.0001             |
|                                             | No, don't know or not stated | 47020        | 5 (2, 9)                      | 311558 | 4.1 +/-4.6          |                      | 11.7%              |                      |
| Immuno-deficiency                           | Immunodeficiency             | 1567         | 5 (2, 8)                      | 9538   | 4.8 +/-5.1          | < 0.0001             | 16.6%              | < 0.0001             |
|                                             | No, don't know or not stated | 48605        | 5 (2, 9)                      | 323754 | 4.0 +/-4.6          |                      | 11.3%              |                      |
| HIV                                         | HIV                          | 291          | 5 (2, 10)                     | 1933   | 4.2 +/-4.6          | 0.031                | 12.7%              | 0.091                |
|                                             | No, don't know or not stated | 49881        | 5 (2, 9)                      | 331359 | 4.0 +/-4.6          |                      | 11.4%              |                      |
| Anemia                                      | Anemia                       | 5491         | 5 (2, 10)                     | 37013  | 5.0 +/-5.0          | < 0.0001             | 16.0%              | < 0.0001             |
|                                             | No, don't know or not stated | 44681        | 5 (2, 9)                      | 296279 | 3.9 +/-4.5          |                      | 10.9%              |                      |
| Pregnant at baseline                        | Pregnant at baseline         | 509          | 4 (2, 8)                      | 2862   | 4.6 +/-4.4          | < 0.0001             | 12.4%              | 0.093                |
|                                             | No, don't know or not stated | 49663        | 5 (2, 9)                      | 330430 | 4.0 +/-4.6          |                      | 11.4%              |                      |
| Date interval                               | 2020-04-22–2020-10-24        | ..           | ..                            | 57964  | 5.1 +/-4.9          | < 0.0001             | 16.2%              | < 0.0001             |
|                                             | 2020-10-25–2021-04-28        | ..           | ..                            | 72270  | 4.6 +/-4.8          |                      | 14.0%              |                      |
|                                             | 2021-04-29–2021-10-30        | ..           | ..                            | 93567  | 3.6 +/-4.3          |                      | 9.4%               |                      |
|                                             | 2021-10-31–2022-05-04        | ..           | ..                            | 109491 | 3.4 +/-4.3          |                      | 8.9%               |                      |
| COVID-19 cases per 100k                     | < 7                          | ..           | ..                            | 81119  | 4.0 +/-4.5          | < 0.0001             | 11.2%              | < 0.0001             |
|                                             | 7–15                         | ..           | ..                            | 83918  | 3.9 +/-4.5          |                      | 11.1%              |                      |
|                                             | > 15–34                      | ..           | ..                            | 84806  | 4.1 +/-4.6          |                      | 11.7%              |                      |
|                                             | > 34                         | ..           | ..                            | 83449  | 4.0 +/-4.6          |                      | 11.6%              |                      |
| COVID-19 deaths per 100k                    | < 0.07                       | ..           | ..                            | 72992  | 3.8 +/-4.5          | < 0.0001             | 10.6%              | < 0.0001             |
|                                             | 0.7–0.17                     | ..           | ..                            | 95007  | 4.0 +/-4.5          |                      | 11.1%              |                      |
|                                             | > 0.17–0.36                  | ..           | ..                            | 82438  | 4.0 +/-4.6          |                      | 11.5%              |                      |
|                                             | > 0.36                       | ..           | ..                            | 82855  | 4.2 +/-4.7          |                      | 12.4%              |                      |
| Difficulty paying for basic living expenses | Not very hard                | ..           | ..                            | 298138 | 3.7 +/-4.3          | < 0.0001             | 9.6%               | < 0.0001             |
|                                             | Somewhat hard                | ..           | ..                            | 22580  | 6.5 +/-5.5          |                      | 24.9%              |                      |
|                                             | Hard                         | ..           | ..                            | 4859   | 8.3 +/-6.0          |                      | 36.6%              |                      |
|                                             | Very hard                    | ..           | ..                            | 3220   | 9.8 +/-6.7          |                      | 47.0%              |                      |
|                                             | Prefer not to state          | ..           | ..                            | 3046   | 4.0 +/-4.9          |                      | 12.2%              |                      |
|                                             | Don't know                   | ..           | ..                            | 1449   | 5.9 +/-5.7          |                      | 23.1%              |                      |
| Difficulty making ends meet                 | Never                        | ..           | ..                            | 266181 | 3.5 +/-4.2          | < 0.0001             | 8.7%               | < 0.0001             |
|                                             | Hardly ever                  | ..           | ..                            | 35337  | 5.1 +/-5.0          |                      | 16.8%              |                      |
|                                             | Occasionally                 | ..           | ..                            | 20837  | 6.7 +/-5.6          |                      | 25.8%              |                      |
|                                             | Frequently                   | ..           | ..                            | 6295   | 9.2 +/-6.4          |                      | 43.1%              |                      |
|                                             | Prefer not to state          | ..           | ..                            | 3056   | 4.5 +/-5.2          |                      | 15.0%              |                      |
|                                             | Don't know                   | ..           | ..                            | 1586   | 6.2 +/-5.6          |                      | 24.2%              |                      |

(Continued)

Table 2. (Continued)

| Characteristic                                                  | Participants                              | Monthly surveys completed     |       | GAD-7 anxiety score |                      |                    |                      |          |
|-----------------------------------------------------------------|-------------------------------------------|-------------------------------|-------|---------------------|----------------------|--------------------|----------------------|----------|
|                                                                 |                                           | Per participant, median (IQR) | Total | Mean +/- SD         | p-value <sup>1</sup> | Proportion ≥ 10, % | p-value <sup>2</sup> |          |
|                                                                 |                                           |                               |       |                     |                      |                    |                      |          |
| Daily activities                                                | Working full time                         | ..                            | ..    | 170824              | 4.4 +/-4.6           | < 0.0001           | 12.9%                | < 0.0001 |
|                                                                 | Working part-time                         | ..                            | ..    | 35153               | 3.9 +/-4.5           |                    | 10.6%                |          |
|                                                                 | Unemployed, laid off, or looking for work | ..                            | ..    | 10968               | 6.2 +/-5.6           |                    | 23.5%                |          |
|                                                                 | In school (full- or part-time student)    | ..                            | ..    | 5770                | 6.3 +/-5.4           |                    | 24.4%                |          |
|                                                                 | Stay-at-home parent or keeping household  | ..                            | ..    | 18825               | 5.0 +/-5.0           |                    | 15.9%                |          |
|                                                                 | Retired                                   | ..                            | ..    | 84259               | 2.3 +/-3.3           |                    | 4.0%                 |          |
|                                                                 | Disabled                                  | ..                            | ..    | 6180                | 6.7 +/-5.8           |                    | 27.6%                |          |
|                                                                 | Prefer not to state                       | ..                            | ..    | 1313                | 4.8 +/-5.4           |                    | 17.1%                |          |
| Income change                                                   | Yes, it has increased                     | ..                            | ..    | 19073               | 4.2 +/-4.6           | < 0.0001           | 12.4%                | < 0.0001 |
|                                                                 | No, it is about the same                  | ..                            | ..    | 289182              | 3.8 +/-4.4           |                    | 10.5%                |          |
|                                                                 | Yes, it has declined                      | ..                            | ..    | 22229               | 6.2 +/-5.6           |                    | 22.7%                |          |
|                                                                 | Prefer not to state                       | ..                            | ..    | 2808                | 4.5 +/-5.3           |                    | 15.5%                |          |
| Working from home                                               | None                                      | ..                            | ..    | 52452               | 4.3 +/-4.8           | < 0.0001           | 13.2%                | < 0.0001 |
|                                                                 | 1–24% of the time                         | ..                            | ..    | 20492               | 4.1 +/-4.5           |                    | 11.2%                |          |
|                                                                 | 25–49% of the time                        | ..                            | ..    | 8937                | 4.2 +/-4.4           |                    | 11.8%                |          |
|                                                                 | 50–74% of the time                        | ..                            | ..    | 13066               | 4.2 +/-4.4           |                    | 11.6%                |          |
|                                                                 | 75–99% of the time                        | ..                            | ..    | 24666               | 4.3 +/-4.5           |                    | 12.1%                |          |
|                                                                 | 100% of the time                          | ..                            | ..    | 86355               | 4.4 +/-4.6           |                    | 12.8%                |          |
|                                                                 | Not stated or not applicable              | ..                            | ..    | 127324              | 3.4 +/-4.5           |                    | 9.6%                 |          |
| COVID-19 test positivity                                        | No prior COVID-19 positive                | ..                            | ..    | 312458              | 4.0 +/-4.6           | 0.0029             | 11.4%                | 0.37     |
|                                                                 | Prior COVID-19 positive                   | ..                            | ..    | 20834               | 3.9 +/-4.7           |                    | 11.6%                |          |
| COVID-19 vaccination                                            | None                                      | ..                            | ..    | 112081              | 4.6 +/-4.8           | < 0.0001           | 13.9%                | < 0.0001 |
|                                                                 | 1 or 2 doses                              | ..                            | ..    | 96175               | 3.6 +/-4.3           |                    | 9.5%                 |          |
|                                                                 | Vaccine + booster                         | ..                            | ..    | 99446               | 3.3 +/-4.2           |                    | 8.6%                 |          |
|                                                                 | No response                               | ..                            | ..    | 25590               | 5.6 +/-5.2           |                    | 18.9%                |          |
| Hospitalization days or ER/urgent care visits in previous month | None or not stated                        | ..                            | ..    | 321447              | 4.0 +/-4.5           | < 0.0001           | 11.2%                | < 0.0001 |
|                                                                 | One                                       | ..                            | ..    | 8823                | 4.9 +/-5.0           |                    | 16.0%                |          |
|                                                                 | More than one                             | ..                            | ..    | 3022                | 5.2 +/-5.3           |                    | 17.7%                |          |
| Worry about the health effects of COVID-19                      | Not worried at all                        | ..                            | ..    | 49720               | 1.8 +/-3.2           | < 0.0001           | 3.5%                 | < 0.0001 |
|                                                                 | A little worried                          | ..                            | ..    | 110795              | 2.7 +/-3.5           |                    | 4.8%                 |          |
|                                                                 | Somewhat worried                          | ..                            | ..    | 104670              | 4.3 +/-4.2           |                    | 11.0%                |          |
|                                                                 | Very worried                              | ..                            | ..    | 48514               | 6.4 +/-5.0           |                    | 22.5%                |          |
|                                                                 | Extremely worried                         | ..                            | ..    | 19593               | 9.4 +/-6.2           |                    | 43.7%                |          |

IQR–Interquartile range; SD–Standard deviation; GAD-7 anxiety score–Anxiety score (scale 0–21) from the Generalized Anxiety Disorder (GAD-7) questionnaire

<sup>1</sup> Welch’s ANOVA for homogeneity of mean GAD-7 scores

<sup>2</sup> chi-squared test or Fisher’s exact test for frequencies of GAD-7 scores ≥ 10; Fisher’s exact test was used for unbalanced groups with ≤ 100 observations for any subgroup

<https://doi.org/10.1371/journal.pone.0297922.t002>

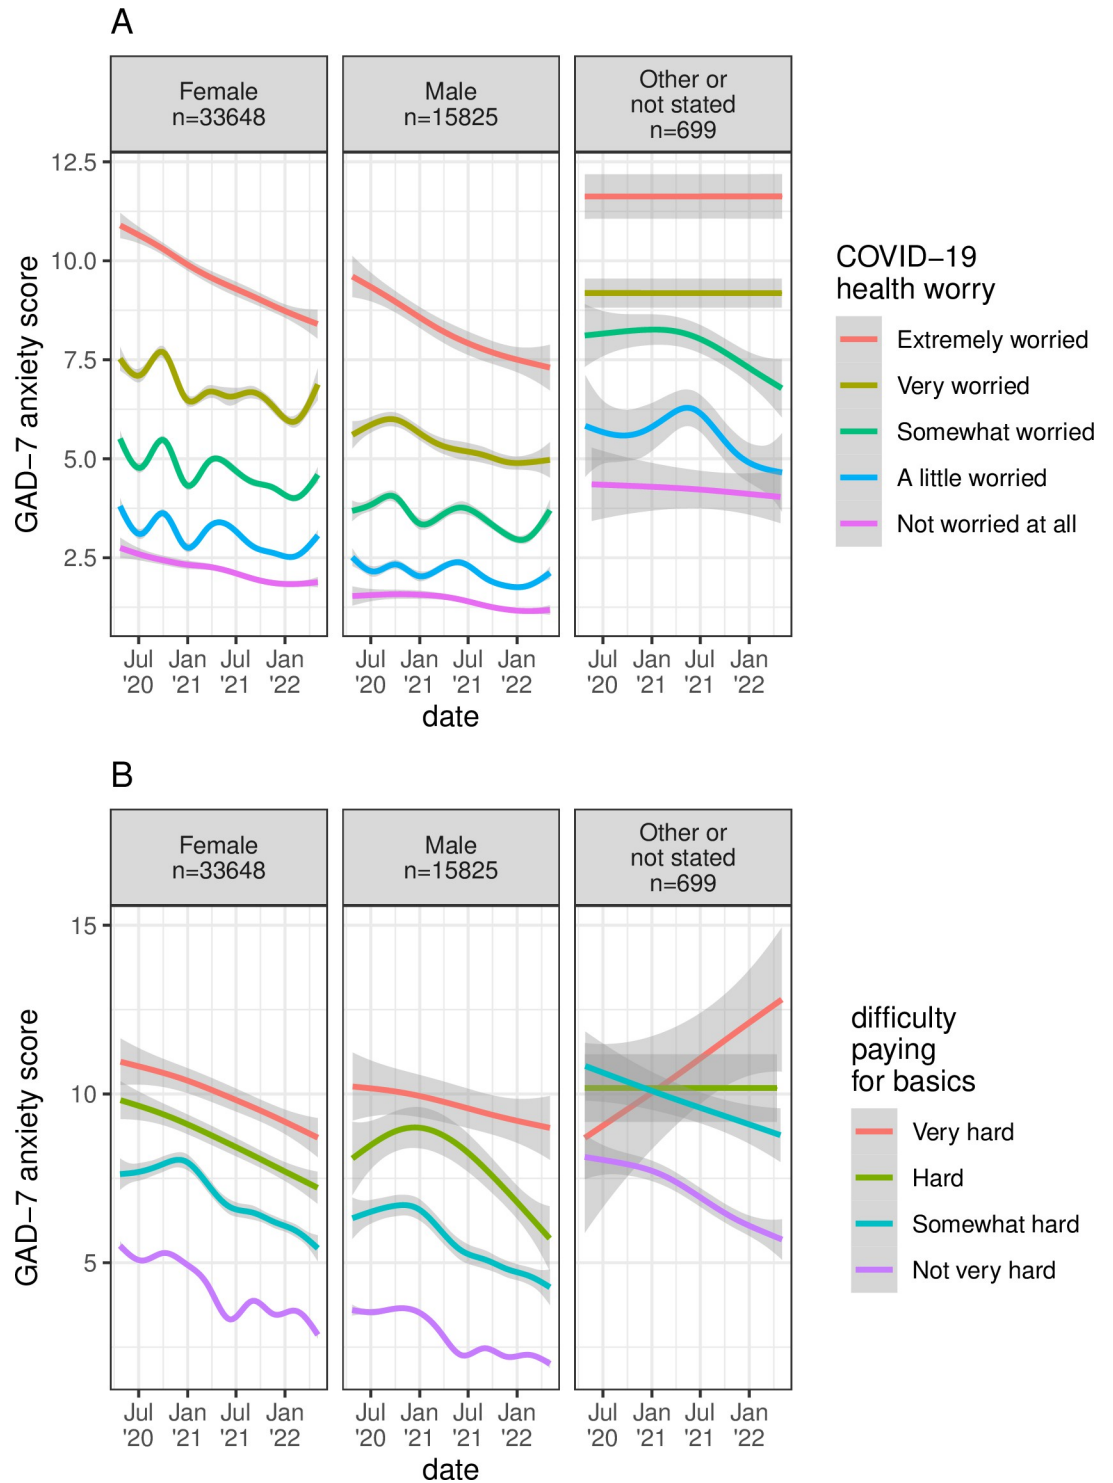

**Fig 1. GAD-7 anxiety scores over the first two years of the pandemic.** Anxiety scores divided by gender are further stratified by worry about the health effects of COVID-19 in panel A, and by difficulty paying for basic living expenses in panel B. Trendlines show unadjusted mean GAD-7 anxiety scores, with 95% confidence intervals shaded in grey. Counts in both panels show total observations in each gender group, including observations associated with non-informative levels of difficulty paying for basic living expenses (“Prefer not to state”, “Don’t know”), which are omitted in panel B.

<https://doi.org/10.1371/journal.pone.0297922.g001>

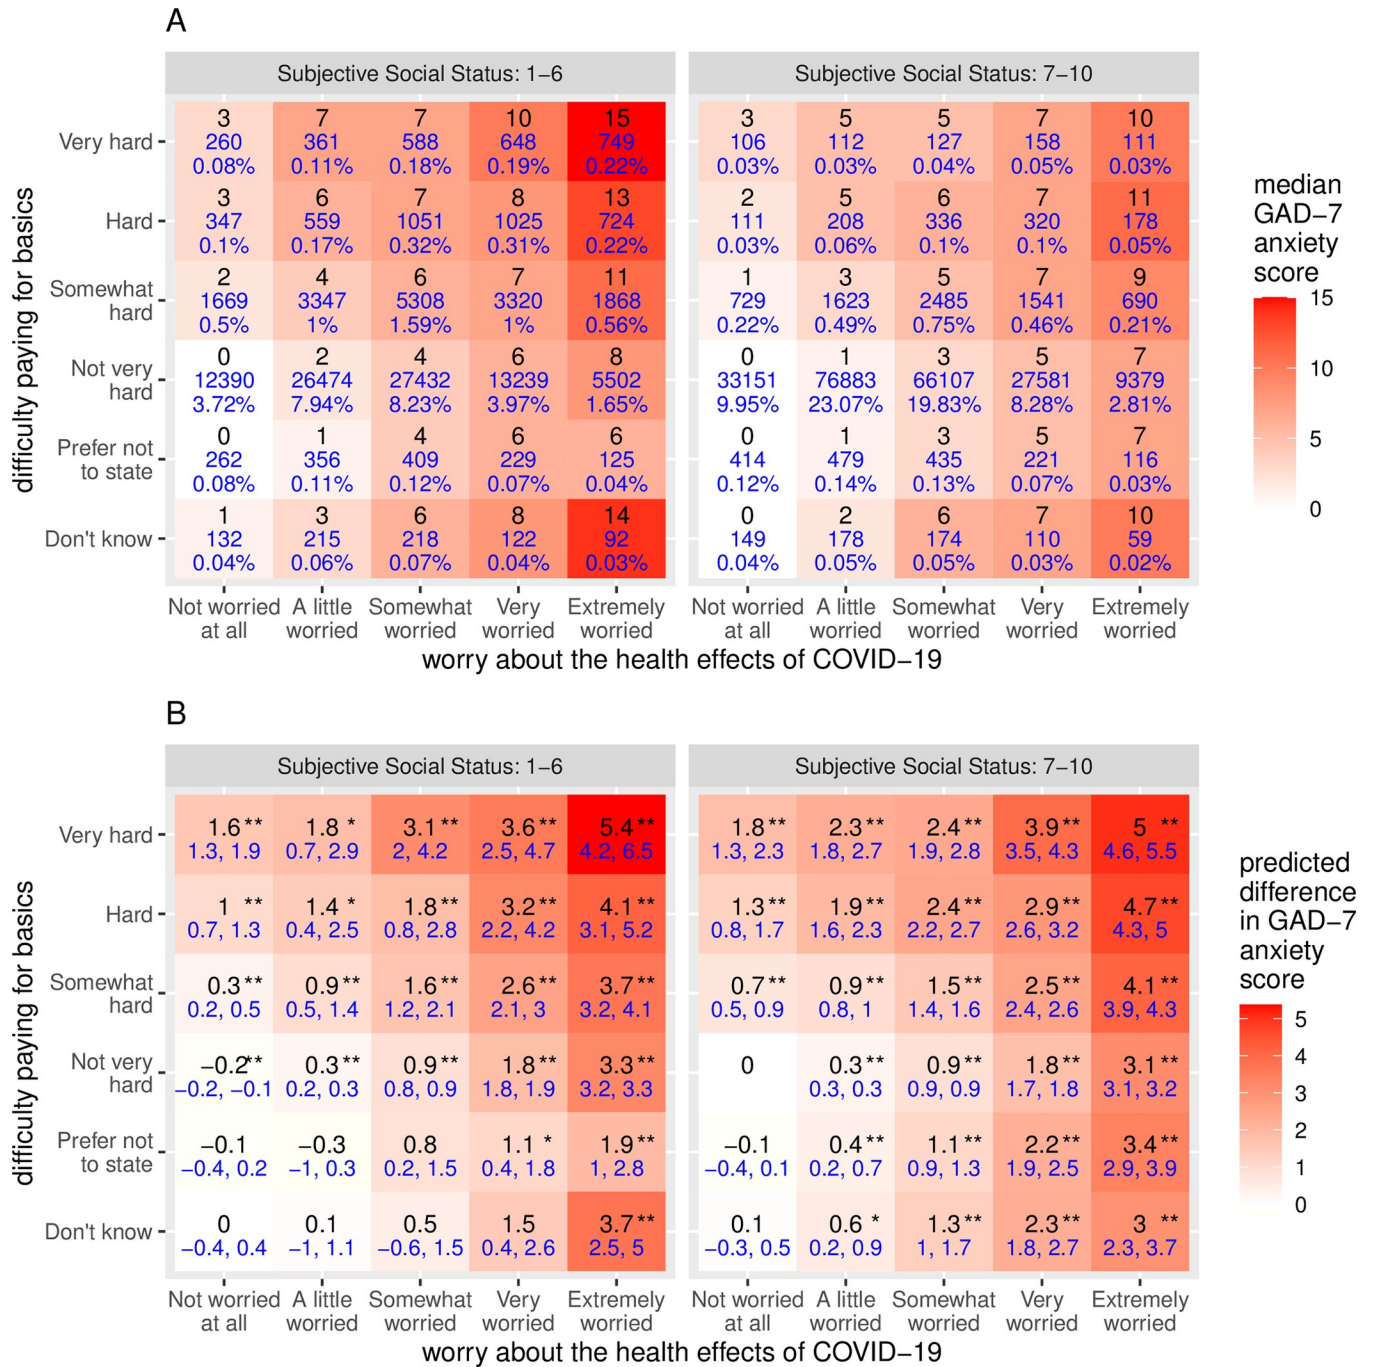

**Fig 2. GAD-7 anxiety scores and associations with COVID-19 health worry, economic stress and subjective social status.** Panel A shows median GAD-7 scores (black) and total observation counts and percentages (blue) cross-tabulated by corresponding responses regarding COVID-19 health worry and difficulty paying for basic living expenses, and stratified by lower versus higher subjective social status. Panel B shows model estimates from a multivariable regression model that includes interactions between these variables. Estimates (black) and 95% confidence intervals (blue) indicate model predictions relative to reference levels of COVID-19 health worry (“Not very worried”), difficulty paying for basics (“Not very hard”) and subjective social status (values between 7–10). \*  $p < 0.01$ , \*\*  $p < 0.001$ .

<https://doi.org/10.1371/journal.pone.0297922.g002>

**Table 3. Associations between COVID-19 health worry, difficulty paying for basic living expenses, and anxiety during the COVID-19 pandemic.**

| COVID-19 Health Worry                     | GAD-7 Score difference (95% confidence intervals) <sup>1</sup> |                                                             |                                      |
|-------------------------------------------|----------------------------------------------------------------|-------------------------------------------------------------|--------------------------------------|
|                                           | Model 1: Adjusted for calendar time <sup>2</sup>               | Model 2: Adjustment for participant tendencies <sup>3</sup> | Model 3: Fully adjusted <sup>4</sup> |
| Not worried or other                      | 0 (reference)                                                  | 0 (reference)                                               | 0 (reference)                        |
| A little worried                          | 0.88 (0.84, 0.93)                                              | 0.38 (0.35, 0.40)                                           | 0.36 (0.33, 0.39)                    |
| Somewhat worried                          | 2.49 (2.45, 2.53)                                              | 1.00 (0.97, 1.03)                                           | 0.95 (0.92, 0.98)                    |
| Very worried                              | 4.57 (4.52, 4.62)                                              | 1.95 (1.92, 1.98)                                           | 1.88 (1.84, 1.91)                    |
| Extremely worried                         | 7.51 (7.44, 7.58)                                              | 3.39 (3.34, 3.43)                                           | 3.28 (3.24, 3.33)                    |
| p-value for trend                         | p < 2e-16                                                      | p < 2e-16                                                   | p < 2e-16                            |
| adjusted R <sup>2</sup>                   | 0.19                                                           | 0.14                                                        | 0.26                                 |
| Difficulty Paying for Basics <sup>5</sup> |                                                                |                                                             |                                      |
| Not very hard                             | 0 (reference)                                                  | 0 (reference)                                               | 0 (reference)                        |
| Somewhat hard                             | 2.86 (2.80, 2.92)                                              | 0.86 (0.83, 0.90)                                           | 0.67 (0.63, 0.70)                    |
| Hard                                      | 4.63 (4.5, 4.75)                                               | 1.74 (1.67, 1.81)                                           | 1.36 (1.29, 1.43)                    |
| Very hard                                 | 6.11 (5.96, 6.26)                                              | 2.57 (2.48, 2.66)                                           | 2.06 (1.97, 2.15)                    |
| p-value for trend                         | p < 2e-16                                                      | p < 2e-16                                                   | p < 2e-16                            |
| adjusted R <sup>2</sup>                   | 0.08                                                           | 0.06                                                        | 0.26                                 |

<sup>1</sup>—Estimates and 95% confidence intervals represent the estimated difference in the Generalized Anxiety Disorder (GAD-7) score (scale 0–21) compared to the indicated reference category from multivariable linear regression models. p < 2e-16 for all point estimates shown.

<sup>2</sup>—Days elapsed following declaration of COVID-19 as a global pandemic by the WHO on March 11, 2020.

<sup>3</sup>—Adjusted for repeated measures from individual participants.

<sup>4</sup>—Additionally adjusted for baseline demographic characteristics, medical conditions, subjective social status, time-varying COVID-19 case and death rates (associated with participant zip code), personal COVID-19 experience and vaccination status, and the other independent variable of interest (both Economic Stress and COVID-19 Worry were included in the model, unlike for Models 1 and 2). No interaction terms are included.

<sup>5</sup>—“Prefer not to state” and “Don’t know” categories for economic stress are omitted from the table.

GAD-7—Generalized Anxiety Disorder (GAD-7) questionnaire

<https://doi.org/10.1371/journal.pone.0297922.t003>

## Discussion

Our analysis of more than 330,000 survey responses from over 50,000 participants in the COVID-19 Citizen Science study shows high levels of anxiety early during the pandemic, with fluctuating declines over the subsequent two years. Worry about the health effects of COVID-19 was strongly associated with anxiety, predicting GAD-7 anxiety scores up to three points higher after adjustment for individual tendencies towards anxiety and other covariates. Economic difficulty was an independent contributor, predicting GAD-7 anxiety scores up to two points higher. The additive effects of COVID-19 health worry and economic difficulty were substantial; participants reporting both had very high levels of anxiety. While the effects of COVID-19 health worry and economic difficulty on anxiety were similar in magnitude for participants reporting lower or higher socioeconomic status, these factors were both disproportionately common in participants with subjectively lower social status.

Anxiety caused substantial suffering during the height of the pandemic. COVID-19 mortality in the US dropped from a peak of nearly 26,000 deaths per week in January 2021 to approximately 1,500 deaths per week as of January 2024. Most restrictive measures have been eased, and many support programs have expired. However, the impacts of the pandemic on physical, mental, and economic well-being remain profound. Our findings underscore previous work documenting the compounding and unequal effects of COVID-19 on physical health, employment, and financial insecurity among socioeconomically disadvantaged and marginalized groups, and the corresponding potential repercussions for mental health [4, 8, 10, 14, 15, 27]. Our analysis also highlights the vulnerability of people for whom health worry and financial



difficulty are potentially in conflict, including those who do not have financial resources to find alternatives when their jobs or housing pose health risks, and those lacking access to affordable healthcare [9, 14, 28]. In our study, difficulty paying for basic living expenses and worry about the health effects of COVID-19 were associated with comparable increases in anxiety, and high levels of economic stress were much more common among socioeconomically vulnerable participants, suggesting that economic distress might outweigh health concerns for at least some people facing difficult decisions when these factors were in conflict.

Our analysis had limitations. We did not investigate all factors that might be important contributors to anxiety, such as social isolation or preexisting mental health conditions. Non-Hispanic white participants comprised the overwhelming majority in this study, limiting our ability to draw insights that might be distinct for other racial and ethnic groups. Roughly half of all participants were from Western states, and many of these were concentrated in metropolitan areas surrounding the San Francisco Bay area in California. In addition, less than 9% of participants in this study were from rural areas, and only 35% reported subjective social status values in the lower two-thirds of the MacArthur scale, underscoring the need for innovations in recruitment to reach more diverse participants for digitally based studies. Only 6% of CCS anxiety surveys were associated with a previous or concurrent positive test for SARS-CoV-2 infection, which may reflect low case rates in the cohort, low rates of testing [29], or both. We did not find evidence that the combined effects of economic difficulty, worry about the health effects of COVID-19, and subjective social status were strongly synergistic, but there are many other potential interactions involving participant characteristics and experiences that might merit investigation as important contributors to anxiety. Lastly, participation was likely influenced by important variables of interest, including anxiety, economic difficulty and worry about COVID-19. In each case, effects might be complex, for example increasing participation at moderate levels of distress while decreasing participation at the highest levels. Despite these limitations, the CCS study presents a unique resource for analyzing mental health over the course of the pandemic in the context of a wide range of participant characteristics and experiences, and our findings have important policy and public health implications.

## Conclusions

Our analyses indicate that mitigation of health risks and economic precarity for the most vulnerable could substantially reduce anxiety related to effects of the pandemic. Our findings also suggest that addressing only one of these factors without the other would leave many at risk for anxiety. Directly addressing rational concerns about health risk and economic insecurity could alleviate pandemic-related anxiety for many [7, 28]. Potential mitigating interventions range from measures to address workplace infection risk including guaranteed paid sick leave and improved indoor air quality, to supports for housing security, expanded access to affordable healthcare and mental health support services, community-centered vaccination campaigns, and programs to support basic levels of income [28, 30]. Such efforts could be instrumental for addressing continuing waves of COVID-19, and future public health emergencies, with potential co-benefits for addressing existing socioeconomic disparities in physical, mental, and economic health.

## Supporting information

**S1 File. Anonymized dataset.**  
(ZIP)

**S1 Table. GAD-7 anxiety survey questionnaire and scoring.**

(PDF)

**S2 Table. Cross-tabulation of observations by participant subjective social status and time-varying worry about the health effects of COVID-19.**

(PDF)

**S3 Table. Cross-tabulation of observations by participant subjective social status and time-varying difficulty paying for basic living expenses.**

(PDF)

**S4 Table. Associations between COVID-19 health worry, difficulty making ends meet and anxiety during the COVID-19 pandemic.**

(PDF)

**S5 Table. Omnibus p-values from multivariable linear regression model with interactions between COVID-19 health worry, difficulty paying for basics, and subjective social status.**

(PDF)

**S6 Table. Associations between COVID-19 health worry, difficulty paying for basic living expenses, and anxiety during the COVID-19 pandemic using the anonymized [S1 File](#).**

(PDF)

## Acknowledgments

The authors thank the Citizen Scientists participating in the Covid-19 Citizen Science Study.

## Author Contributions

**Conceptualization:** Aaron E. Cozen, Thomas Carton, Rita Hamad, John Kornak, Emily C. O'Brien, Djeneba Audrey Djibo, Cheryl N. McMahill-Walraven, Carmen R. Isasi, Alexis L. Beatty, Jeffrey E. Olgin, Gregory M. Marcus, Mark J. Pletcher.

**Data curation:** Aaron E. Cozen, Thomas Carton, Alexis L. Beatty, Jeffrey E. Olgin, Gregory M. Marcus, Mark J. Pletcher.

**Formal analysis:** Aaron E. Cozen.

**Funding acquisition:** Thomas Carton, Rita Hamad, John Kornak, Madelaine Faulkner Modrow, Noah D. Peyser, Emily C. O'Brien, Djeneba Audrey Djibo, Cheryl N. McMahill-Walraven, Carmen R. Isasi, Jeffrey E. Olgin, Gregory M. Marcus, Mark J. Pletcher.

**Investigation:** Aaron E. Cozen, Rita Hamad, John Kornak, Madelaine Faulkner Modrow, Noah D. Peyser, Soo Park, Jaime H. Orozco, Matthew Brandner, Emily C. O'Brien, Djeneba Audrey Djibo, Cheryl N. McMahill-Walraven, Carmen R. Isasi, Alexis L. Beatty, Jeffrey E. Olgin, Gregory M. Marcus, Mark J. Pletcher.

**Methodology:** Rita Hamad, John Kornak, Madelaine Faulkner Modrow, Noah D. Peyser, Soo Park, Jaime H. Orozco, Matthew Brandner, Emily C. O'Brien, Djeneba Audrey Djibo, Cheryl N. McMahill-Walraven, Carmen R. Isasi, Alexis L. Beatty, Jeffrey E. Olgin, Gregory M. Marcus, Mark J. Pletcher.

**Software:** Alexis L. Beatty, Jeffrey E. Olgin, Gregory M. Marcus, Mark J. Pletcher.

**Visualization:** Aaron E. Cozen.

**Writing – original draft:** Aaron E. Cozen.

**Writing – review & editing:** Aaron E. Cozen, Thomas Carton, Rita Hamad, John Kornak, Madelaine Faulkner Modrow, Noah D. Peyser, Soo Park, Jaime H. Orozco, Matthew Brandner, Emily C. O'Brien, Djeneba Audrey Djibo, Cheryl N. McMahill-Walraven, Carmen R. Isasi, Alexis L. Beatty, Jeffrey E. Olgin, Gregory M. Marcus, Mark J. Pletcher.

## References

1. Collaborators C-MD. Global prevalence and burden of depressive and anxiety disorders in 204 countries and territories in 2020 due to the COVID-19 pandemic. *Lancet*. 2021; 398(10312):1700–12. Epub 20211008. [https://doi.org/10.1016/S0140-6736\(21\)02143-7](https://doi.org/10.1016/S0140-6736(21)02143-7) PMID: 34634250; PubMed Central PMCID: PMC8500697.
2. Kessler RC, Chiu WT, Hwang IH, Puac-Polanco V, Sampson NA, Ziobrowski HN, et al. Changes in Prevalence of Mental Illness Among US Adults During Compared with Before the COVID-19 Pandemic. *Psychiatr Clin North Am*. 2022; 45(1):1–28. Epub 20211112. <https://doi.org/10.1016/j.psc.2021.11.013> PMID: 35219431; PubMed Central PMCID: PMC8585610.
3. Household Pulse Survey—Anxiety and Depression October 25, 2022. Available from: <https://www.cdc.gov/nchs/covid19/pulse/mental-health.htm>.
4. Panchal N, Kamal R, Cox C, Garfield R. The Implications of COVID-19 for Mental Health and Substance Use. October 26, 2021. Available from: <https://www.kff.org/coronavirus-covid-19/issue-brief/the-implications-of-covid-19-for-mental-health-and-substance-use/>.
5. Taquet M, Geddes JR, Husain M, Luciano S, Harrison PJ. 6-month neurological and psychiatric outcomes in 236 379 survivors of COVID-19: a retrospective cohort study using electronic health records. *Lancet Psychiatry*. 2021; 8(5):416–27. Epub 20210406. [https://doi.org/10.1016/S2215-0366\(21\)00084-5](https://doi.org/10.1016/S2215-0366(21)00084-5) PMID: 33836148; PubMed Central PMCID: PMC8023694.
6. Xie Y, Xu E, Al-Aly Z. Risks of mental health outcomes in people with covid-19: cohort study. *BMJ*. 2022; 376:e068993. Epub 20220216. <https://doi.org/10.1136/bmj-2021-068993> PMID: 35172971; PubMed Central PMCID: PMC8847881.
7. Kampfen F, Kohler IV, Ciancio A, Bruine de Bruin W, Maurer J, Kohler HP. Predictors of mental health during the Covid-19 pandemic in the US: Role of economic concerns, health worries and social distancing. *PLoS One*. 2020; 15(11):e0241895. Epub 20201111. <https://doi.org/10.1371/journal.pone.0241895> PMID: 33175894; PubMed Central PMCID: PMC7657497.
8. Burns A. Will Long COVID Exacerbate Existing Disparities in Health and Employment? September 23, 2022. Available from: <https://www.kff.org/policy-watch/will-long-covid-exacerbate-existing-disparities-in-health-and-employment/>.
9. Riley AR, Chen YH, Matthay EC, Glymour MM, Torres JM, Fernandez A, et al. Excess mortality among Latino people in California during the COVID-19 pandemic. *SSM Popul Health*. 2021; 15:100860. Epub 20210702. <https://doi.org/10.1016/j.ssmph.2021.100860> PMID: 34307826; PubMed Central PMCID: PMC8283318.
10. Kirzinger A, Sparks G, Hamel L, Stokes M, Montero A, Brodie M. KFF COVID-19 Vaccine Monitor: The Pandemic's Toll on Workers and Family Finances During the Omicron Surge. March 10, 2022. Available from: <https://www.kff.org/coronavirus-covid-19/poll-finding/kff-covid-19-vaccine-monitor-economic-impact/>.
11. Magesh S, John D, Li WT, Li Y, Mattingly-App A, Jain S, et al. Disparities in COVID-19 Outcomes by Race, Ethnicity, and Socioeconomic Status: A Systematic-Review and Meta-analysis. *JAMA Netw Open*. 2021; 4(11):e2134147. Epub 20211101. <https://doi.org/10.1001/jamanetworkopen.2021.34147> PMID: 34762110; PubMed Central PMCID: PMC8586903.
12. Aschmann HE, Riley AR, Chen R, Chen YH, Bibbins-Domingo K, Stokes AC, et al. Dynamics of racial disparities in all-cause mortality during the COVID-19 pandemic. *Proc Natl Acad Sci U S A*. 2022; 119(40):e2210941119. Epub 20220920. <https://doi.org/10.1073/pnas.2210941119> PMID: 36126098; PubMed Central PMCID: PMC9546535.
13. Risk for COVID-19 Infection, Hospitalization, and Death By Race/Ethnicity. December 8, 2022. Available from: <https://www.cdc.gov/coronavirus/2019-ncov/covid-data/investigations-discovery/hospitalization-death-by-race-ethnicity.html>.
14. Goldman N, Pebley AR, Lee K, Andrasfay T, Pratt B. Racial and ethnic differentials in COVID-19-related job exposures by occupational standing in the US. *PLoS One*. 2021; 16(9):e0256085. Epub 20210901. <https://doi.org/10.1371/journal.pone.0256085> PMID: 34469440; PubMed Central PMCID: PMC8409606.
15. Goda GS, Soltas E. The Impacts of Covid-19 Illnesses on Workers. National Bureau of Economic Research Working Paper Series. 2022;No. 30435. <https://doi.org/10.3386/w30435>

16. Falk G, Romero P, Nicchitta I, Nyhof E. Unemployment Rates During the COVID-19 Pandemic. December 15, 2022. Available from: <https://crsreports.congress.gov/product/pdf/R/R46554/21>.
17. Beatty AL, Peyser ND, Butcher XE, Carton TW, Olgin JE, Pletcher MJ, et al. The COVID-19 Citizen Science Study: Protocol for a Longitudinal Digital Health Cohort Study. *JMIR Res Protoc*. 2021; 10(8): e28169. Epub 20210830. <https://doi.org/10.2196/28169> PMID: 34310336; PubMed Central PMCID: PMC8407439.
18. Eureka Research Platform November 16, 2022. Available from: <https://info.eurekaplatform.org/>.
19. Forrest CB, McTigue KM, Hernandez AF, Cohen LW, Cruz H, Haynes K, et al. PCORnet(R) 2020: current state, accomplishments, and future directions. *J Clin Epidemiol*. 2021; 129:60–7. Epub 20200928. <https://doi.org/10.1016/j.jclinepi.2020.09.036> PMID: 33002635; PubMed Central PMCID: PMC7521354.
20. Adler NE, Epel ES, Castellazzo G, Ickovics JR. Relationship of subjective and objective social status with psychological and physiological functioning: preliminary data in healthy white women. *Health Psychol*. 2000; 19(6):586–92. <https://doi.org/10.1037//0278-6133.19.6.586> PMID: 11129362.
21. COVID-19 Cases and Deaths Rolling Averages—County Level. The New York Times [Internet]. 2022 May 11, 2022. Available from: <https://github.com/nytimes/covid-19-data/tree/master/rolling-averages>.
22. Lowe B, Decker O, Muller S, Brahler E, Schellberg D, Herzog W, et al. Validation and standardization of the Generalized Anxiety Disorder Screener (GAD-7) in the general population. *Med Care*. 2008; 46(3):266–74. <https://doi.org/10.1097/MLR.0b013e318160d093> PMID: 18388841.
23. Spitzer RL, Kroenke K, Williams JB, Lowe B. A brief measure for assessing generalized anxiety disorder: the GAD-7. *Arch Intern Med*. 2006; 166(10):1092–7. Epub 2006/05/24. <https://doi.org/10.1001/archinte.166.10.1092> PMID: 16717171.
24. HUD USPS ZIP CODE CROSSWALK FILES 2021 January 3, 2022; (3rd quarter 2021, September 20, 2021). Available from: [https://www.huduser.gov/portal/datasets/usps\\_crosswalk.html](https://www.huduser.gov/portal/datasets/usps_crosswalk.html).
25. Federal Office of Rural Health Policy (FORHP) Data Files 2021 January 11, 2022. Available from: <https://www.hrsa.gov/rural-health/about-us/definition/datafiles.html>.
26. Wood S, Scheipl F. gamm4: Generalized Additive Mixed Models using 'mgcv' and 'lme4' 2020 July 15, 2022. Available from: <https://CRAN.R-project.org/package=gamm4>.
27. Hertz-Palmor N, Moore TM, Gothelf D, DiDomenico GE, Dekel I, Greenberg DM, et al. Association among income loss, financial strain and depressive symptoms during COVID-19: Evidence from two longitudinal studies. *J Affect Disord*. 2021; 291:1–8. Epub 20210505. <https://doi.org/10.1016/j.jad.2021.04.054> PMID: 34022550; PubMed Central PMCID: PMC8460400.
28. Rose N, Manning N, Bentall R, Bhui K, Burgess R, Carr S, et al. The social underpinnings of mental distress in the time of COVID-19—time for urgent action. *Wellcome Open Res*. 2020; 5:166. Epub 20200713. <https://doi.org/10.12688/wellcomeopenres.16123.1> PMID: 32802967; PubMed Central PMCID: PMC7411522.
29. Pletcher MJ, Olgin JE, Peyser ND, Modrow MF, Lin F, Martin J, et al. Factors Associated With Access to and Timing of Coronavirus Testing Among US Adults After Onset of Febrile Illness. *JAMA Netw Open*. 2021; 4(5):e218500. Epub 20210503. <https://doi.org/10.1001/jamanetworkopen.2021.8500> PMID: 33938937; PubMed Central PMCID: PMC8094007.
30. Batra A, Jackson K, Hamad R. Effects Of The 2021 Expanded Child Tax Credit On Adults' Mental Health: A Quasi-Experimental Study. *Health Aff (Millwood)*. 2023; 42(1):74–82. <https://doi.org/10.1377/hlthaff.2022.00733> PMID: 36623218; PubMed Central PMCID: PMC10089297.
